## 40 **Abstract**

41 Theory predicts that a small effective population size leads to slower accumulation of  
42 mutations, increased levels of genetic drift and reduction in the efficiency of natural selection.  
43 Therefore endemic species should harbor low levels of genetic diversity and exhibit a reduced  
44 ability of adaptation to environmental changes. *Arabidopsis pedemontana* and *Arabidopsis*  
45 *cebennensis*, two endemic species from Italy and France respectively, provide an excellent model  
46 to study the adaptive potential of species with small distribution ranges. To evaluate the genome-  
47 wide levels and patterns of genetic variation, effective population size and demographic history  
48 of both species, we genotyped 53 *A. pedemontana* and 28 *A. cebennensis* individuals across the  
49 entire species ranges with Genotyping-by-Sequencing. SNPs data confirmed a low genetic  
50 diversity for *A. pedemontana* although its effective population size is relatively high. Only a weak  
51 population structure was observed over the small distribution range of *A. pedemontana*, resulting  
52 from an isolation-by-distance pattern of gene flow. In contrary, *A. cebennensis* individuals  
53 clustered in three populations according to their geographic distribution. Despite this and a larger  
54 distribution, the overall genetic diversity was even lower for *A. cebennensis* than for *A.*  
55 *pedemontana*. A demographic analysis demonstrated that both endemics have undergone a strong  
56 population size decline in the past, without recovery. The more drastic decline observed in *A.*  
57 *cebennensis* partially explains the very small effective population size observed in the present  
58 population. In light of these results, we discuss the adaptive potential of these endemic species in  
59 the context of rapid climate change.

## 60 **Introduction**

61 A main concern in the current debate on ecological effects of climate change is whether  
62 populations and species can adapt fast enough to keep up with the rapid rate of environmental  
63 changes (Salamin *et al.* 2010). Mitigation of biodiversity loss requires knowledge on ecological  
64 and evolutionary responses of populations to habitat changes, and on the conditions that allow a  
65 recovery of declining populations (Gonzalez *et al.* 2012). Plant endemic species are an important  
66 component of biodiversity, particularly in biodiversity hotspots, where they make up a large  
67 proportion of the local flora (Myers *et al.* 2000). With a limited geographic distribution that is  
68 often tied to specific habitats, endemic species are more vulnerable to environmental changes as  
69 they frequently depend on the existence of particular biotic and abiotic interactions (Thomas *et*  
70 *al.* 2004). For this reason endemic biodiversity should be a central focus of conservation efforts.  
71 Because of their limited distribution range, endemic species tend to have small census population  
72 sizes and smaller effective population sizes,  $N_e$  (Freville *et al.* 2001; Strasburg *et al.* 2011).  
73 Theory predicts that a small effective population size leads to slower accumulation of mutations,  
74 increased levels of genetic drift and reduction in the efficiency of natural selection (reviewed by  
75 Ellstrand & Elam 1993). According to the neutral theory of molecular evolution, genetic diversity  
76 levels at neutral sites reflect a balance between the mutational input per generation and the loss of  
77 genetic variation due to genetic drift (Kimura 1983). All else being equal, species with smaller  
78 population sizes should thus harbor lower levels of neutral genetic diversity (Ramos-Onsins  
79 2004; Leimu *et al.* 2006; Leffler *et al.* 2012). The chance of new, potentially advantageous

80 mutations appearing is also reduced compared to larger populations. Additionally, hard selective  
81 sweeps from new mutations and soft selective sweeps from standing variation are less likely,  
82 reducing the rate of adaptation (Lanfear *et al.* 2014). Furthermore, genetic drift may lead to the  
83 fixation of mildly deleterious mutations which are not efficiently removed because of weak  
84 purifying selection (Kimura 1983; Cao *et al.* 2011; Xue *et al.* 2015), leading potentially to a  
85 mutational meltdown (Lynch *et al.* 1993). Consequently, the direct and indirect effects of a small  
86 effective population size have a strong influence on the evolutionary dynamics and the adaptive  
87 potential of a species (Charlesworth 2009). Continuous adaptation in changing environments  
88 requires sufficient and appropriate genetic variation that provides extreme genotypes capable of  
89 surviving intense stress conditions and allow the population persistence (Reed *et al.* 2011; Bell  
90 2013). Low levels of genetic diversity, reduced average fitness and limited adaptive potential  
91 have been indeed observed for plant populations with small population size (Pluess & Stöcklin  
92 2004; Hensen & Oberprieler 2005; Leimu *et al.* 2006; Michalski & Durka 2007; Leimu & Fischer  
93 2008). A meta-analysis demonstrated that genetic erosion significantly contributes to the  
94 extinction risk of plant species, beside short term demographic and ecological processes  
95 (Spielman *et al.* 2004). To evaluate the adaptive potential and demographic responses of endemic  
96 populations in a rapidly changing environment, it is therefore necessary to estimate levels of  
97 genetic diversity and to infer the evolutionary processes (genetic drift, gene flow, mutation,  
98 mating system) that have shaped the pattern of genetic variation (Reed *et al.* 2011).  
99 In the genus *Arabidopsis*, the two endemic species *Arabidopsis cebennensis* (DC.) and  
100 *Arabidopsis pedemontana* (Boiss.) provide an excellent model of species with restricted ranges.

101 *Arabidopsis thaliana* and its close relatives have become model plant species in population  
102 genetics and the data accumulated for the whole genus enable an interspecific comparative  
103 approach of genetic diversity levels (Mitchell-Olds & Schmitt 2006; Clauss & Koch 2006). The  
104 whole genus reflects the diversity of plant distribution ranges: while *A. thaliana* is distributed  
105 world-wide, *A. cebennensis* and *A. pedemontana* have the smallest distribution range in the genus  
106 (O’Kane & Al-Shehbaz 1997; Koch *et al.* 2008). *Arabidopsis cebennensis* is restricted to the  
107 mountainous Massif Central region in Southern France at elevations ranging from 900 to 1500 m  
108 a.s.l. Highly disjunct populations occur over an area of about 11,000 km<sup>2</sup> in the Cevennes, Cantal,  
109 Aveyron and Ardèche regions. *Arabidopsis pedemontana* occupies a much smaller distribution  
110 range of 50 km<sup>2</sup> in the Piedmont region of the northwestern Italian Alps, at altitude ranging from  
111 1,300 to 2,200 m a.s.l. All known populations of this species occur on the two sides of a single  
112 mountain ridge located between the valleys Po and Pellice. *Arabidopsis pedemontana* is included  
113 in the red list of Italian and Piedmont Floras under the category “critically endangered’ according  
114 to the IUCN definition (The IUCN Species Survival Commission 2004), whereas *A. cebennensis*  
115 is not protected but occurs mostly in national and regional protected reserve areas. The two  
116 species are closely related to each other and their common ancestor is genetically distinct from  
117 other lineages in the genus (Koch & Matschinger 2007; Hohmann *et al.* 2014). They are perennial  
118 diploids and presumably self-incompatible, with a strong tendency for vegetative reproduction by  
119 clonal growth (Hohmann *et al.* 2014). Both species occupy a very specific niche in riverine  
120 habitats (streams and waterfalls), with a semi-continental mountainous climate (cold winters).  
121 Adaptation to this specific habitat led to a very specialized ecology, and phenotypically

122 differentiate them from their relatives which are found in different habitats like meadows or rocky  
123 outcrops. Previous studies revealed a highly reduced diversity for chloroplast DNA, ribosomal  
124 DNA and microsatellite loci in *A. cebennensis* and *A. pedemontana* compared to other  
125 *Arabidopsis* species (Koch & Matschinger 2007; Hohmann *et al.* 2014). Due to this reduced level  
126 of genetic variation, these surveys have not provided much information on genetic structure.  
127 Whole genome approaches are likely more promising.

128 The present work aims to reveal the extent and structure of genetic variation in the two endemic  
129 *A. cebennensis* and *A. pedemontana* on a genome-wide scale. We used Genotyping-By-  
130 Sequencing (GBS, Elshire *et al.* 2011) to obtain genome-wide SNPs for estimating population  
131 genetic parameters. GBS and other reduced-representation sequencing approaches (Davey *et al.*  
132 2011) have rapidly become important tools for the study of genetic diversity, adaptation and  
133 conservation (Narum *et al.* 2013; Huang *et al.* 2014; Gonçalves da Silva *et al.* 2015; Xue *et al.*  
134 2015). As the genomes of both endemic species have not yet been sequenced, we used *A. lyrata*,  
135 which is the most closely related species with a sequenced genome, as a reference for mapping  
136 and SNP calling. Additionally we analyzed the structure of genetic variation at the population  
137 level based on a set of microsatellite loci and plastid DNA sequences from the *trnLF* region,  
138 which have been used previously to characterize *A. cebennensis* and *A. pedemontana* genetic  
139 diversity within the whole genus *Arabidopsis* (Hohmann *et al.* 2014).

140 Based on an extensive sampling representing 90% and 40% of all known locations for *A.*  
141 *pedemontana* and *A. cebennensis*, respectively, we characterized the genetic diversity and the  
142 contemporary effective population size of both endemic species over their entire distribution

143 range. We also investigated how their demographic history may have led to the observed levels of  
144 genetic variation, and tested whether it is consistent with models of declining population sizes. In  
145 light of these new results, we discuss the adaptive potential of the two endemic species in the  
146 context of the probable environmental changes to come.

147

## 148 **Materials and Methods**

149 More detailed information on the materials and methods is available in Text S1.

### 150 **Plant material**

151 All samples were collected between 2010 and 2014 in France and Italy (Fig. 1, Supporting  
152 information, Hohman *et al.* 2014). For GBS, genomic DNA was extracted using a modified  
153 CTAB protocol (Saghai-Marooif *et al.* 1984). For samples collected more recently, DNA was  
154 extracted with the Genomic Micro AX Blood Gravity kit (A&A Biotechnology, Gdynia, Poland).  
155 DNA concentration and quality was checked with agarose gel electrophoresis and Qubit 2.0  
156 Fluorometer (Life Technologies). In the GBS analysis, 53 *A. pedemontana* and 28 *A. cebennensis*  
157 samples were used.

158

### 159 **Genotyping-by-Sequencing (GBS)**

160 Double-digest GBS libraries were constructed based on the design of (Poland *et al.* 2012) with  
161 ApeKI as rare-cutting and HindIII as common restriction enzyme. Adapters and primers  
162 (Metabion) were taken from (Elshire *et al.* 2011). Adapters were modified to introduce 58

163 different barcodes and sticky ends corresponding to ApeKI and HindIII cut sites (Fig. S1). Five  $\mu$ l  
164 of each samples with different barcodes were pooled after adapter ligation. Three pools were  
165 prepared, one with 24 *A. pedemontana* individuals, one with 29 *A. pedemontana* individuals, and  
166 one pool including all 28 *A. cebennensis* samples. The pooled samples were purified with  
167 QIAquick PCR purification kit (Qiagen, Hilden/Germany) and PCR amplified. The GBS libraries  
168 were run on BluePippin (Sage science) for selection of DNA fragments ranging between 200-350  
169 bp. Each of the three pools was sequenced on one lane of the same flowcell, on an Illumina  
170 HiScanSQ with single end sequencing and 105 cycles. With a genome size of around 250 Mbp  
171 for both species (Lysak *et al.* 2009; Hohmann *et al.* 2014) the targeted coverage per site was  
172 between 20 and 30x.

173

#### 174 **Sequence data analysis and SNP calling**

175 Raw reads were processed with custom Python scripts, bwa (Li & Durbin 2009) and FastQC  
176 (<http://www.bioinformatics.babraham.ac.uk/projects/fastqc/>). All reads with ambiguous 'N'  
177 nucleotides and reads with low quality values (< 90% bases with Q>20) were discarded. Read  
178 length after barcode and end-trimming was 90 bp (Supporting information). The pre-processed  
179 reads were aligned to the genome of *Arabidopsis lyrata* strain MN47 (Hu *et al.* 2011) with pBWA  
180 (Peters *et al.* 2012) with 10 mismatches allowed. Biallelic SNPs were called with SAMtools (Li  
181 *et al.* 2009) and custom Python scripts from aligned reads with a minimum mapping quality of 1.  
182 The vcf file was parsed to filter out SNPs with a coverage of at least 30x and at most 3000x,



183 whereby at least five reads had to confirm the variant nucleotide. Five *A. pedemontana* and seven  
184 *A. cebennensis* individuals with less than 5,000 SNPs were excluded to reduce the proportion of  
185 missing values (Supporting information). The SNPs were further filtered using vcfTools (Danecek  
186 *et al.* 2011) to include only intra-specific *A. pedemontana* and *A. cebennensis* polymorphic sites  
187 (Table S2). Two additional files were created including only SNPs with data for at least 50% and  
188 70% of the sampled individuals (Table S2). SNP calling was conducted additionally for ten  
189 different subsets of 21 randomly chosen *A. pedemontana* individuals, in order to compare the  
190 number of SNPs observed for *A. cebennensis* and *A. pedemontana* when working with the same  
191 sample size. The total number of sites (polymorphic and non-polymorphic) and variants (SNPs  
192 and indels) were also calculated, applying the same filters described above, allowing us to  
193 determine the percentage of polymorphic loci for both species.

194

#### 195 **Structure and genetic diversity analysis**

196 Population structure was inferred using SNPs with data for at least 50% of the sampled  
197 individuals. The optimal number of clusters was obtained using ADMIXTURE (Alexander *et al.*  
198 2009) with the cross-validation procedure (--cv) with K ranging from 1 to 9. Ten iterations with  
199 different seed values were completed and compared for homogeneity. Discriminant Analysis of  
200 Principal Components (DAPC; Jombart *et al.* 2010) was conducted using the adegenet R  
201 package, first using the function find.clusters to determine the optimal number of clusters (K),  
202 with  $K \leq 10$ . 25 and 60 principal components (PCs) were kept to explain the variance in *A.*  
203 *cebennensis* and *A. pedemontana* respectively. Phylogenetic networks were generated in

204 SplitsTree (Huson & Bryant 2006) after vcf files were converted into IUPAC coded (Cornish-  
205 Bowden 1985) FASTA files. Distances were calculated using the Uncorrected\_P method, ignoring  
206 ambiguous states, and the network was generated using the Neighbor-net distances  
207 transformation (Bryant & Moulton 2004) with 100 bootstrap replicates. A network was also  
208 constructed for the two species and including the reference *A. lyrata* as outgroup, using SNPs  
209 called between the three species. To investigate the extent to which the genetic distance between  
210 populations was affected by spatial structure (dispersal limitation), and to test the isolation-by-  
211 distance (IBD) hypothesis (Slatkin 1993), a Redundancy Analysis (RDA) was performed  
212 (Borcard *et al.* 1992) using the R package ade4 (Text S1). The presence of migration events  
213 between *A. cebennensis* large populations was tested by running TreeMix v1.12 (Pickrell &  
214 Pritchard 2012) with *A. pedemontana* as outgroup, and four migration events allowed. One  
215 thousand bootstrap replicates were generated by resampling blocks of 500 SNPs.

216 All population genetic parameters were calculated from SNPs with data for at least 70% of the  
217 sampled individuals. The percentage of missing data was calculated using the R package adegenet  
218 1.4-2 (Jombart & Ahmed 2011). Nucleotide diversity ( $\pi$ ) was calculated for each SNP and then  
219 averaged over the total number of sites to obtain an average nucleotide diversity per bp, using the  
220 formula in Begun *et al.* (2007). Watterson's estimator ( $\theta_w$ ) was calculated to compare the number  
221 of segregating sites between the populations. Nei's gene diversity (or proportion of heterozygosity  
222 expected,  $H_{exp}$ ) as well as the proportion of heterozygosity observed ( $H_{obs}$ ) were calculated using  
223 adegenet. The sum of expected heterozygosity per polymorphic sites was divided by the total  
224 number of sites to calculate the mean expected heterozygosity.  $F_{st}$  was calculated per site with the

225 R package pegas 0.6 (Paradis 2010), using the formula of Weir & Cockerham (1984). Mean  
226 values of  $F_{st}$  were calculated over all sites. The partitioning of genetic variability among and  
227 within populations in *A. cebennensis* was analyzed with an AMOVA in Arlequin v.3.5, using  
228 10,000 permutations and pairwise difference as distance calculation method.

229

### 230 **Demographic analysis**

231 The long-term demographic history of the two species was investigated with  $\delta a\delta i$  v1.7.0  
232 (Gutenkunst *et al.* 2009). We examined five one-dimension models for each species  
233 independently, one neutral and four population size change models (Fig. S2). The standard neutral  
234 model (SNM) assumes a constant population size (ancestral population size  $N_a$ ). For the simple  
235 exponential size change model 1a, the population size has changed instantaneously at time  $T$  in  
236 the past to yield a present population size of  $N$ . Model 1b assumes that the population size has  
237 changed exponentially since time  $T$  in the past, leading to a contemporary population size  $N$ .  
238 Model 1c assumes that the species have first experienced an instantaneous size change, yielding a  
239 population size of  $N_0$ , followed by an exponential population size change, going from  $N_0$  to  $N$  in  
240 time  $T$ . In Model 1d, we expand Model 1a by incorporating a second instantaneous size change  
241 event. At time  $T + T_0$  in the past, the population goes through a size change of depth  $N_0$ , and then  
242 recovers to relative size  $N$ . The last two models allow us test the probability of a past bottleneck  
243 event followed by either recovery or further decrease of the population size. Additionally we  
244 tested three two-populations models in which *A. cebennensis* and *A. pedemontana* diverged from  
245 an ancestral population (Fig. S2). In model 2a, at  $T_{pc} \times 2N_a$  generations ago, the two species split,

246 yielding a stable contemporary population size  $N_c$  for *A. cebennensis* and  $N_p$  for *A. pedemontana*.  
247 In model 2b, the split is followed by exponential size change of both new species, going from  
248  $N_{c0}/N_{p0}$  to  $N_c/N_p$  during the time  $T_{pc}$  since the divergence. In model 2c, we incorporated a  
249 bottleneck event in the ancestral equilibrium population before the divergence of the species. The  
250 depth and duration of the bottleneck are denoted by  $N_0$  and  $T_0$  respectively. The Python script  
251 implementing the models is provided as Supporting information.  
252 The models were fitted to the SNPs dataset with data for at least 70% of the sampled individuals.  
253 The data joint site frequency spectrum (SFS) was estimated by  $\delta\text{a}\delta\text{i}$ , and projected down to 15  
254 individuals for *A. cebennensis*, nine for *A. cebennensis* Cantal population alone, and 40  
255 individuals for *A. pedemontana*, which provided 6,583, 3,981, and 10,422 SNPs for the single-  
256 population models. For the two-population models, the data was projected down to a sample of  
257 14 and 30 individuals for *A. cebennensis* and *A. pedemontana* respectively, which provided a  
258 large number of segregating sites (10,442). The SFS were folded. Parameters for each model  
259 were optimized with the upper and lower bounds, arbitrary start values and grid sizes indicated in  
260 Supporting information. Multiple optimizations runs were evaluated for each model to ensure the  
261 convergence of the optimized parameters. To estimate parameter's confidence intervals (CIs), 100  
262 replicate pseudo-data sets were generated by bootstrapping the SNP data by 1 Mb regions on the  
263 *A. lyrata* scaffolds to account for putative linkage between the SNPs. CIs were estimated using  
264 the SFS of the bootstrapped data sets. The log composite likelihood of each model was calculated  
265 using  $\delta\text{a}\delta\text{i}$ 's `ll_multinom` function and the likelihood ratio test was used to test if the differences in  
266 the likelihood values between the models were significant.

267

## 268 **Microsatellite and plastid DNA sequence analysis**

269 In a previous work, 148 *A. cebennensis* individuals from ten populations and 40 *A. pedemontana*  
270 individuals from nine populations were genotyped with seven microsatellite loci and sequences  
271 from the *trnLF* region (Hohmann *et al.* 2014). Detailed experimental protocols are available in  
272 this study. We carried out a population structure analysis of the two endemic species based on this  
273 dataset. Geographic locations of the populations analyzed, total numbers of alleles and mean  
274 number of allele per locus for the seven microsatellite loci are indicated in Fig. S3 and Supporting  
275 information. Microsatellite genotypes were analyzed using STRUCTURE v.2.3.4 (Pritchard *et al.*  
276 2000; Hubisz *et al.* 2009). Ten replicates were run for each K-value and a burn-in-period of 1 x  
277 10<sup>5</sup> and 2 x 10<sup>5</sup> iterations was used. The option 'admixture model' was used in combination with  
278 'correlated allele frequencies'. The estimation of the optimal K number of populations (ranging  
279 from 1 to 5) was calculated using the R-script Structure-sum (Ehrich 2006). Input files for  
280 CLUMPP were generated with STRUCTURE HARVESTER (Earl & VonHoldt 2012),  
281 alignments of replicate runs were conducted in CLUMPP (Jakobsson & Rosenberg 2007), and the  
282 mean of 10 runs were visualized.

283

## 284 **Results**

### 285 **GBS and polymorphisms**

286 Forty-eight *A. pedemontana* individuals from 29 locations and 21 *A. cebennensis* individuals

287 from five locations were included in the final analysis. Only results based on SNPs with data for  
288 at least 70% of the sampled individuals are presented, except if noted otherwise. The average read  
289 coverage per site over all individuals was 465 for *A. cebennensis* and 1,124 for *A. pedemontana*.  
290 The number of SNPs and percentage of polymorphic loci over all sites were more than two times  
291 higher in *A. pedemontana* than in *A. cebennensis* (Table 1). When the SNP calling was conducted  
292 on ten different subsets of 21 randomly sampled *A. pedemontana* individuals, the resulting  
293 average number of SNPs was 11,858 SNPs (Table S3), which is only ~1,000 less than the number  
294 of SNPs observed for the total sample of *A. pedemontana*. This shows that the different levels of  
295 polymorphism in *A. cebennensis* and *A. pedemontana* are not caused by contrasting sampling  
296 sizes but truly indicate a higher level of polymorphism in *A. pedemontana*.

297 The Neighbor-net network constructed for the two species and the outgroup *A. lyrata* shows a  
298 clear distinction between them, with high bootstrap support for the branches leading to each  
299 species (Fig. S4). *Arabidopsis pedemontana* and *A. cebennensis* are closer to each other in the  
300 network. 667 common SNPs called independently in *A. cebennensis* (10%) and *A. pedemontana*  
301 (5%) have shared alleles, indicating a high level of shared variation between the two sibling  
302 species.

303

### 304 **Population structure**

305 Based on the geographic distribution of the samples (Fig. 1), our initial hypotheses were: 1)  
306 Genetic variation in *A. cebennensis* should primarily cluster according to the three large regions  
307 where this taxon is observed in the Massif central; 2) Distinct patterns of variation should be

308 observed for *A. pedemontana* between the two valleys where the species occurs, as the mountain  
309 range constitutes a natural barrier to dispersion. In the ADMIXTURE analysis the lowest cross-  
310 validation value was always found when assuming  $K=2$  for *A. cebennensis*, followed closely by  
311  $K=3$  (Fig. S5). With  $K=2$ , individuals from Cantal are separated from Ardèche and Cévennes  
312 individuals. The clustering for  $K=3$  (Fig. 2) corresponds exactly to the origin of the individuals,  
313 from the Ardèche, Cévennes and Cantal regions. For  $K=4$ , individuals from Cantal were further  
314 split into two groups, with location 139R separated from locations 140R and 141R. For *A.*  
315 *cebennensis*, six PCs and two discriminant functions were retained when describing clusters with  
316 DAPC, which supported the  $K=3$  clustering. The Neighbor-Net network of *A. cebennensis* also  
317 separated the Ardèche, Cantal and Cévennes populations with strong bootstrap support (Fig. 2).  
318 Within the Cantal population, individuals from site 139R clustered apart with strong support  
319 while individuals from 140R and 141R sites were mixed. We used TreeMix to test for gene flow  
320 between the three allopatric populations of *A. cebennensis*. In the resulting maximum likelihood  
321 tree, Ardèche and Cévennes populations are grouped together with a strong support (bootstrap  
322 99.8%; Fig. S6). Only a single migration event, from Ardèche to Cantal, was inferred, but it  
323 shows a low bootstrap value (52%) and low average weight over all bootstrap replicates (13%).  
324 This indicates no or very limited gene flow between the three *A. cebennensis* populations. The  
325 genetic assignment by STRUCTURE based on microsatellite data also resulted in an optimal  
326 value of  $K=3$ , reflecting the distribution of sampled populations in their respective geographic  
327 regions (Fig. S3), although with some level of admixture, specially between Ardèche and  
328 Cévennes individuals. However, one very small population from the Cantal region (145R) is most

329 closely associated with the genetic cluster found in the Cévennes region. This population is  
330 located at an artificial creek close to a forest road side. Considering that also its chloroplast  
331 genome type is identical to the Cévennes region (Fig. S3), it is more likely that we observed here  
332 a very rare case of recent long-distance dispersal, maybe promoted by humans. Strong  
333 phylogeographic signal in *A. cebennensis* is highly supported by the distribution of maternally  
334 inherited plastid DNA types (*trnLF* loci). In the three major regions, distinct types prevail and we  
335 did not find variation within a population. The Redundancy analysis (RDA) on genetic diversity  
336 with spatial variables explained 92.5% of the total variance in genetic diversity. However the  
337 spatial variables (distance) did not have a significant contribution ( $p>0.05$ ), rejecting isolation by  
338 distance as responsible for the strong structure observed in *A. cebennensis*.

339 For *A. pedemontana*, the ADMIXTURE analysis did not suggest population structure as the  
340 cross-validation value slowly increased for  $K=1$  to  $K=9$  (Fig. S5). Inspection of population  
341 assignment for  $K=2$  did not confirm our hypothesis of a differentiation of *A. pedemontana*  
342 individuals between the two valleys. Instead, individuals from Vallone di Fiunira (Fiunira)  
343 clustered as one genotype while individuals from Comba della Gianna (Giana) presented an  
344 admixture of both detected genotypes (Table S1). When describing clusters with DAPC, 15 PCs  
345 and 1 discriminant functions were retained. The DAPC analysis confirmed the results of the  
346 ADMIXTURE analysis (Fig. 3). Phylogenetic analysis of *A. pedemontana* confirmed a weak  
347 population structure with a star-shaped network, with low support for internal edges and long  
348 terminal branches (Fig. 3). However, clusters could still be observed that corresponded to the  
349 geographic distribution of the samples. For example, all individuals from Valle Po were clustered,



350 with subgroups for the East and West part of the valley with a good bootstrap support. All  
351 individuals from Fiunira and Gianna were also grouped together, although this large cluster was  
352 not strongly differentiated from the remaining individuals and showed a weak bootstrap support.  
353 Within this group, the samples from the site 007 appeared very closely related to each other,  
354 showing the homogeneity of individuals in one location. The same was observed for the site 004.  
355 Although the microsatellite sampling for *A. pedemontana* was less complete, it contained one  
356 population that was not sampled with GBS (114; Supporting information). The genetic  
357 assignment tests for microsatellite data did not find a significant K exceeding 1, confirming the  
358 GBS results. If “LocPriors” were set and varying from 2 to 9, a significant K=2 was found,  
359 separating population 114 from the other investigated populations (Fig. S3). It is consistent with  
360 the fact that geographic distances are correlated to genetic differentiation in *A. pedemontana*, as  
361 population 114 was the only one sampled in Valley Po for this dataset. However, with the more  
362 uniformly distributed samples in the GBS analysis, no higher-level structure is apparent between  
363 valley Po and valley Pellice. RDA analysis on genetic diversity with spatial variables explained a  
364 significant contribution of 13.5% of the total variance in genetic diversity found in populations  
365 ( $p < 0.05$ ). Hence dispersal limitation due to geographic distances (isolation-by-distance model)  
366 appears to be responsible for the weak structure observed in *A. pedemontana*. The level of plastid  
367 DNA variation is very low as only the ancestral type A was found (Fig. S3).

368

### 369 **F<sub>st</sub>-based analysis of genetic differentiation**

370 The mean pairwise genetic distance based on F<sub>st</sub> values between *A. cebennensis* populations were

371 similar ( $\sim 0.17-0.19 \pm 0.007$ ), with the greatest distance observed between Ardèche and Cantal  
372 (Fig. 2).  $F_{st}$  values were high compared to the distance between the two species ( $0.33 \pm 0.005$ ).  
373 Within the Cantal population, the subpopulation 139R and 140/141R displayed a much lower  
374 mean  $F_{st}$  over sites ( $0.05 \pm 0.005$ ). *Arabidopsis pedemontana* individuals from Fiunira/Gianna  
375 clustered together showed a mean  $F_{st}$  of  $0.04 \pm 0.001$  with the rest of *A. pedemontana* samples,  
376 and such a weak differentiation did not support this clustering. The distributions of  $F_{st}$  values  
377 between the two species and between the three subpopulations of *A. cebennensis* were  
378 homogeneous, with high and low  $F_{st}$  observed equally all along *A. lyrata* scaffolds used as  
379 reference genome (Fig. S7).

380

### 381 **Intraspecific genetic diversity**

382 The nucleotide diversity per base pair averaged on total number of sites ( $\pi$ ) was calculated for  
383 both species (Table 2).  $\pi$  was 0.0026 for *A. cebennensis* and 0.0040 for *A. pedemontana*. The  
384 distribution of  $\pi$  per SNP was homogeneous along *A. lyrata* scaffolds for both species (see  
385 Manhattan plots in Fig. S8), indicating that the genetic variability within each species is  
386 distributed uniformly along chromosomes. The three *A. cebennensis* populations displayed  
387 similar values of  $\pi$  (Table 2).  $\theta_w$  values were almost identical to  $\pi$  (Table 2). *Arabidopsis*  
388 *cebennensis* also displayed a lower mean expected heterozygosity ( $H_{exp}$ ) than *A. pedemontana*  
389 (Table 2). The mean observed heterozygosity ( $H_{obs}$ ) calculated were only slightly lower than the  
390 expected values. These results showed a higher diversity overall in *A. pedemontana* sampled  
391 populations compared to *A. cebennensis*. In *A. cebennensis*, 39% of the genetic variability in the

392 species is explained by the population structure (among populations), while the rest is explained  
393 by individuals within populations.

394

### 395 **Species demographic history**

396 To infer the history of the two species, we tested five single-population demographic models  
397 using the joint site frequency spectrum (SFS) and the maximum likelihood methods implemented  
398 in  $\delta a\delta i$ . Considering the western alpine and sub-alpine distribution of the two species, and the fact  
399 that they occur at the highest possible elevation of the surrounding regions, we assumed they  
400 diverged during a glaciation area, and survived only in refugia in higher altitude during warming  
401 period, where they were already adapted to the colder conditions. Such a scenario implies a  
402 strong population decline of the species somewhere in their past. For each species, we fitted  
403 models 1a to 1d to test for different scenarios of population size change and compared the results  
404 to the standard neutral model (SNM) (Fig. S2). We were unsuccessful in testing models  
405 incorporating a split of *A. cebennensis* in three sub-populations, due to the sampling size and the  
406 quantity of segregating sites obtained for each of these populations. The observed minor allele  
407 frequency spectra of *A. cebennensis* and *A. pedemontana* were quite different. In *A.*  
408 *pedemontana*, the declining function (larger number of rarer alleles) is consistent with mutation-  
409 drift equilibrium in a stable population (log composite likelihood value LL = -334.4 for SNM).  
410 *Arabidopsis cebennensis* SFS was right-shifted (biased towards intermediate frequency alleles),  
411 deviating from the neutral expectation (LL = -1229.8 for SNM). This was explained by the strong  
412 population structure in *A. cebennensis*. The  $\delta a\delta i$  analyses suggest that the instantaneous

413 population size change model 1a and the exponential size change model 1b are better than the  
414 SNM based on LL values and fitting plots (Fig. 4 and Fig. S2). The two models 1a and 1b fitted  
415 the observed data significantly better than the dual size change model 1c (with an error  $\alpha =$   
416 5%, Adjusted D-statistic = -0.79 for *A. cebennensis* and -3.75 for *A. pedemontana*, p-value = 1).  
417 Model 1d fitted the observed data poorly (Fig. S2).  
418 Equivalent fits were observed for models 1a and 1b, which could not be compared with a  
419 likelihood ratio test (LRT) as they were not nested. Both suggested a strong population decline  
420 for the two species (Fig. 4) and indicated a deeper reduction and smaller relative population size  
421 for *A. cebennensis*: the effective population size of this species has been reduced to  
422 approximately 0.1% of its ancestral population size  $N_a$  (Fig. 4). In contrast, the *A. pedemontana*  
423 population shrunk only to half of its  $N_a$ . Assuming an average generation time of two years and  
424 an overall mutation rate of  $7 \times 10^{-9}$  base substitutions per site per generation (Ossowski *et al.*  
425 2010) we estimated the modern effective population size of *A. cebennensis* to be  $\approx 140$  [0-287]  
426 from model 1a or  $\approx 450$  [365-548] from model 1b. The effective population size for *A.*  
427 *pedemontana* was  $\approx 55,000$  [47,455-62,056] from model 1a and  $\approx 50,000$  [42,377-58,411] from  
428 model 1b. Our estimates placed the drastic population size decrease in *A. cebennensis* either  $\approx$   
429 230 [0-689] years ago (model 1a) or  $\approx 3,700$  [3,044-4,262] years ago (model 1b). The decrease of  
430 *A. pedemontana* population was estimated either  $\approx 18,000$  [9,126-27,378] (model 1a) or  $\approx 41,000$   
431 years ago (model 1b).  
432 As the population structure observed in *A. cebennensis* was not modeled in the analysis, it could  
433 explain the non-optimal fitting between the models SFS and *A. cebennensis* observed SFS, the

434 larger correlated residuals for *A. cebennensis*, and the strikingly low population size estimated for  
435 this species. To evaluate the effect of strong population structure on model fitting, we additionally  
436 fitted all single-population models to the observed data of the Cantal population separately. This  
437 population, for which we have the largest sample size (nine individuals), provides a  
438 representative dataset for the whole species without effect of structure. However the SFS  
439 observed for the Cantal population was also biased toward intermediate allele frequencies (Fig.  
440 S2) and the single-population models did not fit the Cantal data better than the whole species  
441 dataset. The structure observed previously within the Cantal population was very weak ( $F_{st} = 0.05$   
442 between clusters 139R and 140R/141R) and cannot completely explain the SFS observed. In all  
443 models, the contemporary population size was as low as for the whole *A. cebennensis* dataset.  
444 A second hypothesis was that *A. cebennensis* and *A. pedemontana* diverged after the  
445 establishment of their common ancestor to the different refugia areas, the French sub-alpine  
446 region Massif central and the alpine Piedmont region in Italy. Their divergence would have  
447 resulted from the absence of gene flow due to geographical barriers. This scenario assumes a  
448 bottleneck would have happened in the common ancestor of the two species during a deglaciation  
449 period, shortly before speciation. It was tested by fitting the two-population bottleneck model 2c  
450 and comparing the results to the fitting of models 2a and 2b, which assume the divergence of the  
451 two species prior to instantaneous and exponential size change respectively. All two-populations  
452 models fitted the data very poorly based on LL values and fitting plots (Fig. S2). The lack of  
453 outgroup information and previous assumptions on any parameters of the model, the number of  
454 parameters to optimize and the potential linkage existing between our SNPs ( $\delta a \delta i$  assumes that all

455 polymorphic sites are independent) may explain why none of the tested two-populations models  
456 fitted the data well. The fact that model 2c display the lowest LL is not in favor of a scenario  
457 including a bottleneck in the common ancestor population. The inferred divergence time between  
458 *A. cebennensis* and *A. pedemontana* was similar for models 2a and 2b (0.40  $N_a$  generations ago).  
459 From model 2b we estimated that the speciation events occurred  $\approx 168.000$  [159676-176484]  
460 years ago.

## 461 **Discussion**

462 As endemic species have higher probabilities to display a small census and effective population  
463 size and a highly specific ecology, reduced genetic diversity could be a limiting factor for their  
464 adaptive potential in changing environments (Ellstrand & Elam 1993; Frankham 1995; Allendorf  
465 & Ryman 2002; Leimu *et al.* 2006). In this study we evaluated the extent and structure of genetic  
466 variation in the two endemic species *A. cebennensis* and *A. pedemontana*, using samples from  
467 most of their currently known locations in southern France and northwestern Italy. Their  
468 demographic history was also investigated and their present effective population size estimated in  
469 order to determine which processes shaped the modern pattern of genetic diversity.

470

### 471 ***Genetic structure***

472 *Arabidopsis cebennensis* presented three clearly distinct populations corresponding to the large  
473 geographic regions Cantal, Cévennes, and Ardèche, which are represented in this study by 11,  
474 four and six samples respectively. Ardèche and Cévennes individuals were more closely related to  
475 each other. The Cantal population can be further subdivided between subpopulation 139R (4  
476 individuals) and subpopulation 140R/141R (7 individuals). This was surprising considering that  
477 the populations 139R and 140R are geographically closer to each other (~ 4 km) than to the  
478 population 141R (~ 15 km) indicating either dispersal between the Chambeuil and the Le Siniq  
479 springs where 141R and 140R populations are respectively located, or simply shared ancestry. No  
480 reliable gene flow event could be detected between the three allopatric *A. cebennensis*

481 populations in their recent or past history. We assume that strong barriers of gene flow exist  
482 among these units and that they are evolving independently through genetic drift. It was not  
483 surprising that an isolation-by-distance pattern (Slatkin 1993) was not apparent as only a small  
484 proportion of the total variation is expected to be spatially correlated in case of extremely limited  
485 dispersal (Meirmans 2015). In contrast, *A. pedemontana* showed only a weak clustering of  
486 individuals, probably as a result of an IBD pattern of gene flow. Dispersal is thus maintained but  
487 limited to relatively short distance within *A. pedemontana* distribution range, certainly because of  
488 the mountainous relief of the region. While *A. pedemontana* known sampling sites are all in  
489 maximum 10 km from each other, the three *A. cebennensis* populations are ~100 km away from  
490 each other with only one known additional isolated population in Aveyron, between the Cantal  
491 and the Cévennes. These long distances, the natural barriers they include, and the ecological  
492 specialization of the species explain why the connectivity among *A. cebennensis* populations is  
493 not maintained. The mean pairwise  $F_{st}$  values pointed out the isolation of these populations as  
494 they were almost as differentiated between each other than the species is differentiated from *A.*  
495 *pedemontana*. However, the genetic distance between *A. cebennensis* and *A. pedemontana* (0.33)  
496 was not high compared to other intra and inter-specific comparisons in the genus using neutral  
497 markers: the average pairwise  $F_{st}$  between populations of *A. halleri* from two large units separated  
498 by the Alps, was around 0.37 (Pauwels *et al.* 2012); the average  $F_{st}$  calculated between 31 *A.*  
499 *halleri* and 48 *A. lyrata* individuals was  $0.46 \pm 0.211$ , although this value was conservative as it  
500 was calculated from nuclear coding sequences only (Roux *et al.* 2011); the median pairwise  $F_{st}$   
501 values calculated by Ross-Ibarra *et al.* (2008) for six natural populations of *A. lyrata* from across



502 the range of the species were between 0 and 0.6 with 12 on 15 comparisons above 0.2. The  
503 median  $F_{st}$  between *A. cebennensis* and *A. pedemontana* was 0.22, which is equal or lower than  
504 many intra-specific comparisons within *A. lyrata*.

505

### 506 **Genetic diversity**

507 Interestingly, the number and percentage of polymorphic loci were twice as high for *A.*  
508 *pedemontana* as for *A. cebennensis*. The nucleotide diversity ( $\pi$ ), Watterson's estimator ( $\theta_w$ ) and  
509 Nei's gene diversity ( $H_{exp}$ ) were all higher for *A. pedemontana* compared to *A. cebennensis*,  
510 supporting a greater genetic diversity in the Italian species despite its smaller distribution range.  
511 Only the plastid DNA variation was lower for *A. pedemontana* with only one *trnLF* plastid region  
512 haplotype while *A. cebennensis* displayed four different types (Hohmann *et al.* 2014). *A. halleri*,  
513 *A. arenosa*, and *A. lyrata*, the three major lineages in the genus, presented 14, 32 and 30  
514 suprahaplotypes, much more than what was observed for the two endemics. Like *A. cebennensis*  
515 and *A. pedemontana*, *A. lyrata* and *A. halleri* are diploid, outcrossing and perennial species, but  
516 they are widely distributed. Higher average  $\pi$  values were also found for *A. halleri* ssp. *halleri*  
517 (0.0081) and *A. lyrata* ssp. *petraea* (0.0116) (Ramos-Onsins 2004) compared to *A. pedemontana*  
518 (0.004) and *A. cebennensis* (0.0026). The average  $\pi$  value in *A. thaliana* was also higher (0.0054)  
519 although the species is selfing (Nordborg *et al.* 2005). With the set of microsatellite loci included  
520 here for structure analysis, the highest number of total alleles, unique alleles and rare alleles,  
521 considering only diploids, were found within widely distributed *A. lyrata* ssp. *petraea* and *A.*  
522 *carpatica* (*A. arenosa* lineage; Hohmann *et al.* 2014). These diversity statistics were the lowest

523 for *A. pedemontana* and *A. cebennensis*, as well as *A. croatica*, a third endemic species in the  
524 genus (Hohmann *et al.* 2014). Microsatellite  $H_{exp}$ , calculated overall in each major lineage, is  
525 highest in *A. lyrata* ( $0.562 \pm 0.312$ ) and *A. arenosa* ( $0.560 \pm 0.311$ ), lower in *A. halleri* ( $0.427 \pm$   
526  $0.254$ ) and much lower in *A. pedemontana* ( $0.259 \pm 0.167$ ) and *A. cebennensis* ( $0.189 \pm 0.130$ ).  
527 When calculating mean  $H_{exp}$  over SNPs only (and not over the total number of mapped sites), we  
528 obtained similar values with 0.33 for *A. cebennensis* and 0.23 for *A. pedemontana*. Only for this  
529 comparison *A. pedemontana* does not display a higher genetic diversity compared to *A.*  
530 *cebennensis*. Overall, we observe that the genetic variation level in the two endemic species is  
531 lower than for the other *Arabidopsis* species with wide distribution range and the same mating  
532 system (self-incompatibility). For comparison, the narrow endemic *Aquilegia thalictrifolia*,  
533 distributed in a few valleys of the Italian South-Eastern Alps, also displayed a higher average  $H_{exp}$   
534 ( $0.68 \pm 0.19$ ), which is twice as high as for the two *Arabidopsis* endemics (Lega *et al.* 2014). In  
535 *A. cebennensis*  $\pi$ ,  $\theta_w$  and  $H_{exp}$  were low and almost similar for the three subpopulations, and  
536 similar to what was estimated for the whole species. A similar level of genetic diversity is  
537 partitioned among and within the subpopulations in this species. It shows that gene flow was too  
538 limited to ensure that variation is shared over the whole distribution of the species, and led to the  
539 strong population structure observed. Overall, both *A. pedemontana* and *A. cebennensis* display  
540 low levels of genetic variation at the taxon and population levels, as would be predicted based on  
541 their narrow geographic range.

542

543 ***Comparison of population genetics inference methods***

544 The SNPs from the GBS analysis and the microsatellites markers gave similar results with regard  
545 to population structure, despite the differences in sampling size. In *A. cebennensis*, the level of  
546 admixture observed between the Ardèche and Cévennes populations with the microsatellite data  
547 confirm that these two populations had more recent genetic exchanges than with the Cantal  
548 populations. Concerning genetic diversity statistics, the GBS analyses gave much lower  $H_{exp}$   
549 values than the microsatellites markers when both polymorphic and non-polymorphic sites were  
550 accounted for. As it takes in account the number of SNPs detected over the total number of sites,  
551 this approach gives a more realistic estimation of the level of heterozygosity over the whole  
552 genome. Nonetheless the two methods of polymorphism detection gave similar results in terms of  
553 ratio of  $H_{exp}$  between the two endemic species. The genome-wide SNPs and the multiple  
554 microsatellite loci were thus equally useful in inferring population structure and comparing the  
555 level of diversity between related species in our study. One advantage of using GBS is to screen  
556 thousands of polymorphism that are subject to the full range of evolutionary processes acting  
557 across the genome (mutation, drift, selection) (Narum *et al.* 2013) and improve the precision of  
558 demographic inferences by greatly increasing the number of putatively neutral markers assayed.

### 559 ***Past decline of the endemics populations***

560 Our overall neighbor-net network with *A. lyrata*, *A. cebennensis* and *A. pedemontana* confirmed  
561 previous observations that the two endemic species, although clearly separated, are sister species  
562 (Koch & Matschinger 2007; Hohmann *et al.* 2014). Additionally, 10% and 5% of the total  
563 polymorphism in *A. cebennensis* and *A. pedemontana* are shared polymorphisms, confirming the  
564 joint evolutionary history of the two species. As the two species are ecologically, morphologically

565 and in certain case phylogenetically closer to *A. halleri* (Hohmann *et al.* 2014), we assumed that  
566 they diverged from a common ancestor related to *A. halleri* lineage. *A. halleri* is distributed in the  
567 whole alpine chain while the endemic species occur in refuge areas west of the mountainous  
568 range, at the highest altitude in the surroundings. The periphery of European Alps, in particular  
569 the south east and the west of the mountain range, harbors many small refugia with hundreds of  
570 endemic plant species, which result from Pleistocene glaciation cycles (Comes & Kadereit 2003;  
571 Tribsch & Schonswetter 2003; Schönswetter *et al.* 2005). We therefore hypothesized that the  
572 evolutionary histories of both species have been influenced by Pleistocene climate oscillations:  
573 the two cold-adapted species diverged from their common ancestor in the western alps during a  
574 glaciation period; with the next deglaciation phases the populations migrated or became restricted  
575 to refugia in higher altitude where they could survive the warming temperatures, resulting in a  
576 strong overall population size decrease; because of their adaptation to their specific refugia  
577 habitat and/or competition, they could not expand back to their unknown original distribution  
578 range, forming relictual populations.

579 The demographic analysis confirmed that both endemic species have undergone a strong decline  
580 in the past and did not recover to the present days, although we were not able to state if this  
581 decline happened through a strong bottleneck or through exponential population size decrease.  
582 The population decline was particularly strong for *A. cebennensis*, which displayed a  
583 contemporary effective population size  $N_e$  of 140 to 450 individuals, only 0.1% of the size of its  
584 ancestral population. *A. pedemontana*'s decline was less drastic, as the species exhibits a modern  
585  $N_e$  of 50,000-55,000 individuals, half of its ancestral population size. In comparison, Roux *et al.*

586 (2011) estimated  $N_e$  of  $\sim 82,000$  and  $\sim 79,200$  for the two more widespread relatives *A. halleri* and  
587 *A. lyrata*. According to our estimates, *A. pedemontana* population started decreasing 18,000 to  
588 41,000 years ago (ya), while *A. cebennensis*' decline was much more recent, i.e. 200 to 3,700 ya.  
589 The time of divergence of the two species was estimated at  $\sim 170,000$  ya. However these  
590 estimates are doubtful for two reasons: (i) the two-populations demographic models within which  
591 the time of divergence parameter was optimized fitted the observed dataset poorly; (ii) the time  
592 values were converted in units of years by using an average generation time of two years.  
593 Because the two species are long-lived perennials, propagate vastly vegetatively, and their  
594 dispersal could be limited for some times by their specific ecology and the space competition  
595 observed in their habitat (pers. obs.), the chosen generation time as well as the divergence time  
596 and times of decline could be underestimated. The divergence of *A. cebennensis* and *A.*  
597 *pedemontana* falls in the medium Pleistocene (Ionien), which corroborates our hypothesis. These  
598 results fit with the time of radiation calculated for all *Arabidopsis* lineages with  $n = 8$   
599 chromosomes (all except *A. thaliana*) (1.63 Mya; Hohmann *et al.* 2015), and for *A. halleri* ssp.  
600 *halleri* ( $\sim 335,000$  ya; Roux *et al.* 2011). While *A. pedemontana*'s decline falls still in the late  
601 Pleistocene, the decline of *A. cebennensis* seems to have occurred in modern time (Holocene). As  
602 the demographic models (1a and 1b) used to estimate this value did not fit *A. cebennensis*  
603 observed data SFS perfectly, and *A. cebennensis* population structure was not included in the  
604 models, we can not say with certainty that this very recent estimate is accurate. Our separate  
605 demographic analysis of *A. cebennensis* Cantal population showed that the strong population  
606 structure of *A. cebennensis* alone does not explain completely the right-shifted site frequency

607 spectrum observed for this species and the extremely low population size that was estimated.  
608 While population structure could explain the excess of intermediate frequency alleles, a recent  
609 strong bottleneck could explain the lack of rare alleles (Luikart *et al.* 1998) and the small  
610 population size. In the future, the evolutionary history of the three *A. cebennensis* populations  
611 will be further investigated with an extended and more representative sampling scheme, which  
612 will also allow us to integrate the population structure into the demographic analysis. Particularly  
613 we will test if the structure and the sampling size together have created a false bottleneck signal  
614 for this species (Chikhi *et al.* 2010).

615

#### 616 ***Consequence on adaptive potential***

617 In summary we described two endemics dissimilar patterns of genetic variation and  
618 differentiation. Due to a potentially rapid and recent decline, and its split into three allopatric  
619 populations, *A. cebennensis* currently exhibits a very low effective population size and low levels  
620 of genetic diversity. Although the absence of gene flow between these three sub-populations  
621 initiated their divergence by genetic drift or divergent selection (according to  $F_{st}$  values), the  
622 genetic diversity among them is also low (according to  $\pi$  values). The probability of finding  
623 strongly differentiated genotypes and phenotypes in the different geographic region where the  
624 species occurs is consequently small. *Arabidopsis pedemontana* population also declined rapidly  
625 in the past but not as strongly as for *A. cebennensis*, and *A. pedemontana* effective population size  
626 is still relatively high. Distance-limited dispersal is ongoing within its distribution range but did  
627 not contribute to create much diversity between the locations. Indeed the overall diversity level

628 remains low. The contemporary population size, levels of gene flow versus genetic drift and  
629 demographic history of both species can explain why we observed higher level of diversity for *A.*  
630 *pedemontana* compared to *A. cebennensis*, despite its smaller distribution range. A historically  
631 larger population size in *A. pedemontana* could also have contributed to its higher level of genetic  
632 diversity.

633 These first results are not optimistic regarding the adaptive potential of the two species in case of  
634 environmental change. The relatively recent and on-going global climate warming could impact  
635 the habitats of these two species by two means: 1) In Europe, it was already observed that climate  
636 change causes a general upward migration of plants to higher altitudes where they may compete  
637 with locally adapted endemic plants (Lenoir *et al.* 2008); 2) The increasing drought that could  
638 result from rising temperatures and decreasing precipitation predicted to be induced by climate  
639 change could particularly impact the highly specific riverine habitat of the two species. As a  
640 result, the occurrence of the two species in high altitude habitats, where they can not escape the  
641 increased competition, and their habitat specialization render them particularly vulnerable to  
642 climate change (Gottfried *et al.* 2012). Predicting populations persistence during environmental  
643 change is complex as it depends on numerous factors (Reed *et al.* 2011). However, with the  
644 relatively low levels of genetic diversity observed, we can predict that the two *Arabidopsis*  
645 endemic species may experience reduced relative adaptive ability and a higher risk of genetic  
646 extinction. The risk could be relatively higher for *A. cebennensis*, as small population size  
647 decrease the rates of adaptive evolution (Strasburg *et al.* 2011; Lanfear *et al.* 2014) and do not  
648 allow the populations to sustain further decline before evolutionary rescue (Gonzalez *et al.* 2012).

649

650 **Acknowledgments**

651 We thank Elizabeth Kokai-Kota for laboratory assistance, and Markus Stetter and Fabian Freund  
652 for help with the population genetic analysis. Financial support was provided to K.J.Schmid by  
653 the DGF Grant SCHM1354/6-1 within the DFG priority programme 'Adaptomics'.



## 654 **References**

655

656 Alexander DH, Novembre J, Lange K (2009) Fast model-based estimation of ancestry in  
657 unrelated individuals. *Genome Research*, **19**, 1655–64.

658 Allendorf FW, Ryman N (2002) The role of genetics in population viability analysis. In:  
659 Population Viability Analysis (eds Beissinger SR, McCullough DR), pp. 50–85. University  
660 Chicago press.

661 Begun DJ, Holloway AK, Stevens K *et al.* (2007) Population genomics: whole-genome analysis  
662 of polymorphism and divergence in *Drosophila simulans*. *PLoS Biology*, **5**, e310.

663 Bell G (2013) Evolutionary rescue and the limits of adaptation. *Philosophical transactions of the*  
664 *Royal Society of London*, **368**, 20120080.

665 Borcard D, Legendre P, Drapeau P (1992) Partialling out the Spatial Component of Ecological  
666 Variation. *Ecology*, **73**, 1045–1055.

667 Bryant D, Moulton V (2004) Neighbor-net: an agglomerative method for the construction of  
668 phylogenetic networks. *Molecular Biology and Evolution*, **21**, 255–65.

669 Cao J, Schneeberger K, Ossowski S *et al.* (2011) Whole-genome sequencing of multiple  
670 *Arabidopsis thaliana* populations. *Nature Genetics*, **43**, 956–963.

671 Charlesworth B (2009) Effective population size and patterns of molecular evolution and  
672 variation. *Nature Reviews Genetics*, **10**, 195–205.

673 Chikhi L, Sousa VC, Luisi P, Goossens B, Beaumont MA (2010) The confounding effects of  
674 population structure, genetic diversity and the sampling scheme on the detection and  
675 quantification of population size changes. *Genetics*, **186**, 983–95.

676 Claus MJ, Koch MA (2006) Poorly known relatives of *Arabidopsis thaliana*. *Trends in Plant*  
677 *Science*, **11**, 449–459.

678 Comes HP, Kadereit JW (2003) Spatial and temporal patterns in the evolution of the flora of the  
679 European Alpine System. *Taxon*, **52**, 451–462.

680 Cornish-Bowden A (1985) Nomenclature for incompletely specified bases in nucleic acid  
681 sequences: recommendations 1984. *Nucleic acids research*, **13**, 3021–3030.

682 Danecek P, Auton A, Abecasis G *et al.* (2011) The variant call format and VCFtools.  
683 *Bioinformatics*, **27**, 2156–8.

684 Davey JW, Hohenlohe PA, Etter PD *et al.* (2011) Genome-wide genetic marker discovery and  
685 genotyping using next-generation sequencing. *Nature Reviews Genetics*, **12**, 499–510.

686 Earl DA, VonHoldt BM (2012) STRUCTURE HARVESTER : a website and program for

- 687 visualizing STRUCTURE output and implementing the Evanno method. *Conservation*  
688 *Genetics Resources*, **4**, 359–361.
- 689 Ehrich D (2006) AFLPDAT: A collection of R functions for convenient handling of AFLP data.  
690 *Molecular Ecology Notes*, **6**, 603–604.
- 691 Ellstrand NC, Elam DR (1993) Population genetic consequences of small population size:  
692 Implications for Plant Conservation. *Annual Review of Ecology and Systematics*, **24**, 217–  
693 242.
- 694 Elshire RJ, Glaubitz JC, Sun Q *et al.* (2011) A robust, simple genotyping-by-sequencing (GBS)  
695 approach for high diversity species. *PLoS one*, **6**, e19379.
- 696 Frankham R (1995) Conservation genetics. *Annual Review of Genetics*, **29**, 305–327.
- 697 Freville H, Justy F, Olivieri I (2001) Comparative allozyme and microsatellite population  
698 structure in a narrow endemic plant species, *Centaurea corymbosa* Pourret (Asteraceae).  
699 *Molecular Ecology*, **10**, 879–889.
- 700 Gonçalves da Silva A, Appleyard SA, Upston J (2015) Establishing the evolutionary  
701 compatibility of potential sources of colonizers for overfished stocks: a population genomics  
702 approach. *Molecular Ecology*, **24**, 564–79.
- 703 Gonzalez A, Ronce O, Ferriere R, Hochberg ME (2012) Evolutionary rescue: an emerging focus  
704 at the intersection between ecology and evolution. *Philosophical transactions of the Royal*  
705 *Society of London*, **368**, 20120404.
- 706 Gottfried M, Pauli H, Futschik A *et al.* (2012) Continent-wide response of mountain vegetation to  
707 climate change. *Nature Climate Change*, **2**, 111–115.
- 708 Gutenkunst RN, Hernandez RD, Williamson SH, Bustamante CD (2009) Inferring the joint  
709 demographic history of multiple populations from multidimensional SNP frequency data.  
710 *PLoS genetics*, **5**, e1000695.
- 711 Hensen I, Oberprieler C (2005) Effects of population size on genetic diversity and seed  
712 production in the rare *Dictamnus albus* (Rutaceae) in central Germany. *Conservation*  
713 *Genetics*, **6**, 63–73.
- 714 Hohmann N, Schmickl R, Chiang T *et al.* (2014) Taming the wild : resolving the gene pools of  
715 non-model *Arabidopsis* lineages. *BMC Evolutionary Biology*, **14**, 1–21.
- 716 Hohmann N, Wolf EM, Lysak MA, Koch MA (2015) A time-calibrated road map of Brassicaceae  
717 species radiation and evolutionary history. *The Plant Cell*, 1–16.
- 718 Hu TT, Pattyn P, Bakker EG *et al.* (2011) The *Arabidopsis lyrata* genome sequence and the basis  
719 of rapid genome size change. *Nature Genetics*, **43**, 476–481.

- 720 Huang P, Feldman M, Schroder S *et al.* (2014) Population genetics of *Setaria viridis*, a new  
721 model system. *Molecular Ecology*, **23**, 4912–25.
- 722 Hubisz MJ, Falush D, Stephens M, Pritchard JK (2009) Inferring weak population structure with  
723 the assistance of sample group information. *Molecular Ecology Resources*, **9**, 1322–32.
- 724 Jombart T, Devillard S, Balloux F (2010) Discriminant analysis of principal components : a new  
725 method for the analysis of genetically structured populations. *BMC Genetics*, **11**, 94.
- 726 Kimura M (1983) The Neutral Theory of Molecular Evolution. *Scientific American*, **241**, 65-97.
- 727 Koch MA, Matschinger M (2007) Evolution and genetic differentiation among relatives of  
728 *Arabidopsis thaliana*. *Proceedings of the National Academy of Sciences of the United States*  
729 *of America*, **104**, 6272–6277.
- 730 Koch MA, Wernisch M, Schmickl R (2008) *Arabidopsis thaliana*'s wild relatives: an updated  
731 overview on systematics, taxonomy and evolution. *Taxon*, **57**, 933–943.
- 732 Lanfear R, Kokko H, Eyre-Walker A (2014) Population size and the rate of evolution. *Trends in*  
733 *Ecology & Evolution*, **29**, 33–41.
- 734 Leffler EM, Bullaughey K, Matute DR *et al.* (2012) Revisiting an old riddle: what determines  
735 genetic diversity levels within species? *PLoS Biology*, **10**, e1001388.
- 736 Lega M, Fior S, Li M, Leonardi S, Varotto C (2014) Genetic drift linked to heterogeneous  
737 landscape and ecological specialization drives diversification in the alpine endemic  
738 columbine. *Journal of Heredity*, **105**, 542–554.
- 739 Leimu R, Fischer M (2008) A meta-analysis of local adaptation in plants. *PloS one*, **3**, e4010.
- 740 Leimu R, Mutikainen PIA, Koricheva J, Fischer M (2006) How general are positive relationships  
741 between plant population size, fitness and genetic variation? *Journal of Ecology*, **94**, 942–  
742 952.
- 743 Lenoir J, Gégout JC, Marquet PA, De Ruffray P, Brisse H (2008) A significant upward shift in  
744 plant species optimum elevation during the 20th Century. *Science*, **320**, 1768–1771.
- 745 Li H, Durbin R (2009) Fast and accurate short read alignment with Burrows-Wheeler transform.  
746 *Bioinformatics*, **25**, 1754–60.
- 747 Li H, Handsaker B, Wysoker A *et al.* (2009) The Sequence Alignment/Map format and  
748 SAMtools. *Bioinformatics*, **25**, 2078–2079.
- 749 Luikart G, Allendorf FW, Cornuet J, Sherwin WB (1998) Distortion of allele frequency  
750 distributions provides a test for recent population bottlenecks. *The Journal of Heredity*, **89**,  
751 238–247.
- 752 Lynch M, Burger R, Butcher D, Gabriel W (1993) The mutational meltdown in asexual

- 753 populations. *Journal of Heredity*, **84**, 339–344.
- 754 Lysak MA, Koch MA, Beaulieu JM, Meister A, Leitch IJ (2009) The dynamic ups and downs of  
755 genome size evolution in Brassicaceae. *Molecular Biology and Evolution*, **26**, 85–98.
- 756 Michalski SG, Durka W (2007) High selfing and high inbreeding depression in peripheral  
757 populations of *Juncus atratus*. *Molecular Ecology*, **16**, 4715–27.
- 758 Mitchell-Olds T, Schmitt J (2006) Genetic mechanisms and evolutionary significance of natural  
759 variation in *Arabidopsis*. *Nature*, **441**, 947–52.
- 760 Myers N, Mittermeier RA, Mittermeier CG, da Fonseca GA, Kent J (2000) Biodiversity hotspots  
761 for conservation priorities. *Nature*, **403**, 853–8.
- 762 Narum SR, Buerkle CA, Davey JW, Miller MR, Hohenlohe PA (2013) Genotyping-by-  
763 sequencing in ecological and conservation genomics. *Molecular Ecology*, **22**, 2841–7.
- 764 Nordborg M, Hu TT, Ishino Y *et al.* (2005) The pattern of polymorphism in *Arabidopsis thaliana*.  
765 *PLoS biology*, **3**, e196.
- 766 O’Kane SL, Al-Shehbaz IA (1997) A Synopsis of *Arabidopsis* (Brassicaceae). *Novon*, **7**, 323–  
767 327.
- 768 Ossowski S, Schneeberger K, Lucas-Iledó JI *et al.* (2010) The rate and molecular spectrum of  
769 spontaneous mutations in *Arabidopsis thaliana*. *Science*, **327**, 92–94.
- 770 Paradis E (2010) Pegas: An R package for population genetics with an integrated-modular  
771 approach. *Bioinformatics*, **26**, 419–420.
- 772 Pauwels M, Vekemans X, Godé C *et al.* (2012) Nuclear and chloroplast DNA phylogeography  
773 reveals vicariance among European populations of the model species for the study of metal  
774 tolerance, *Arabidopsis halleri* (Brassicaceae). *New Phytologist*, **193**, 916–928.
- 775 Peters D, Luo X, Qiu K, Liang P (2012) Speeding Up Large-Scale Next Generation Sequencing  
776 Data Analysis with pBWA. *Journal of Applied Bioinformatics & Computational Biology*, **1**,  
777 1–6.
- 778 Pickrell JK, Pritchard JK (2012) Inference of population splits and mixtures from genome-wide  
779 allele frequency data. *PLoS genetics*, **8**, e1002967.
- 780 Pluess AR, Stöcklin J (2004) Genetic diversity and fitness in *Scabiosa columbaria* in the Swiss  
781 Jura in relation to population size. *Conservation Genetics*, **5**, 145–156.
- 782 Poland JA, Brown PJ, Sorrells ME, Jannink J-L (2012) Development of high-density genetic  
783 maps for barley and wheat using a novel two-enzyme genotyping-by-sequencing approach.  
784 *PloS one*, **7**, e32253.
- 785 Pritchard JK, Stephens M, Donnelly P (2000) Inference of population structure using multilocus

- 786 genotype data. *Genetics*, **155**, 945–959.
- 787 Ramos-Onsins SE (2004) Multilocus Analysis of Variation and Speciation in the Closely Related  
788 Species *Arabidopsis halleri* and *A. lyrata*. *Genetics*, **166**, 373–388.
- 789 Reed TE, Schindler DE, Waples RS (2011) Interacting effects of phenotypic plasticity and  
790 evolution on population persistence in a changing climate. *Conservation Biology*, **25**, 56–63.
- 791 Ross-Ibarra J, Wright SI, Foxe JP *et al.* (2008) Patterns of polymorphism and demographic  
792 history in natural populations of *Arabidopsis lyrata*. *PloS one*, **3**, e2411.
- 793 Roux C, Castric V, Pauwels M *et al.* (2011) Does speciation between *Arabidopsis halleri* and  
794 *Arabidopsis lyrata* coincide with major changes in a molecular target of adaptation ? *PloS*  
795 *one*, **6**, e26872.
- 796 Saghai-Marooif MA, Soliman KM, Jorgensen RA, Allard RW (1984) Ribosomal DNA spacer-  
797 length polymorphisms in barley: mendelian inheritance, chromosomal location, and  
798 population dynamics. *Proceedings of the National Academy of Sciences of the United States*  
799 *of America*, **81**, 8014–8018.
- 800 Salamin N, Wüest RO, Laverigne S, Thuiller W, Pearman PB (2010) Assessing rapid evolution in  
801 a changing environment. *Trends in Ecology & Evolution*, **25**, 692–8.
- 802 Schönswetter P, Stehlik I, Holderegger R, Tribsch A (2005) Molecular evidence for glacial  
803 refugia of mountain plants in the European Alps. *Molecular Ecology*, **14**, 3547–3555.
- 804 Slatkin M (1993) Isolation by Distance in equilibrium and non-equilibrium populations.  
805 *Evolution*, **47**, 264–279.
- 806 Spielman D, Brook BW, Frankham R (2004) Most species are not driven to extinction before  
807 genetic factors impact them. *Proceedings of the National Academy of Sciences of the United*  
808 *States of America*, **101**, 15261–4.
- 809 Strasburg JL, Kane NC, Raduski AR *et al.* (2011) Effective population size is positively  
810 correlated with levels of adaptive divergence among annual sunflowers. *Molecular Biology*  
811 *and Evolution*, **28**, 1569–1580.
- 812 The IUCN Species Survival Commission (2004) 2004 IUCN red list of threatened species: a  
813 global species assessment. (eds Baillie J, Hilton-Taylor C, Stuart S). IUCN Publications  
814 Services Unit, Cambridge, CB3 ODL, UK.
- 815 Thomas CD, Cameron A, Green RE *et al.* (2004) Extinction risk from climate change. *Nature*,  
816 **427**, 145–8.
- 817 Tribsch A, Schönswetter P (2003) Patterns of endemism and comparative phylogeography  
818 confirm palaeoenvironmental evidence for pleistocene refugia in the eastern Alps. *Taxon*, **52**,  
819 477–497.

820 Weir B, Cockerham CC (1984) Estimating F-Statistics for the analysis of population structure.  
821 *Evolution*, **38**, 1358–1370.

822 Xue Y, Prado-Martinez J, Sudmant PH *et al.* (2015) Mountain gorilla genomes reveal the impact  
823 of long-term population decline and inbreeding. *Science*, **348**, 242–5.

824

## 825 **Data Accessibility**

826 - GBS raw reads: Genbank NCBI submission SRP072277

827 - Biallelic SNPs final vcf files: DataDryad

828 - Demographic analysis scripts: Supporting information

829

## 830 **Author Contributions**

831 JJ coordinated the project, performed the GBS sequencing and population genetic analysis and  
832 wrote the manuscript. NH and MAK conducted the microsatellite and plastid DNA sequences  
833 analysis and contributed to write the manuscript. MB contributed to the sample collection and  
834 DNA extraction. AS helped with the sample collection. TM assisted with the GBS reads  
835 processing and population genetic analysis. KJS designed and coordinated the project and  
836 contributed in writing the manuscript. All authors read and approved the final manuscript.

837

838

839 **Tables**

840

841 Table 1. GBS analysis output: Number of total and polymorphic sites. Only SNPs with data for at  
842 least 70% of the sampled individuals are included.

843

844

845

846

847

848

849

850

851

852

853 Table 2. Intra-specific genetic diversity parameters

854

855

856

|                             | <i>A. cebennensis</i> | <i>A. pedemontana</i> |
|-----------------------------|-----------------------|-----------------------|
| Total sites                 | 874,955               | 739,868               |
| SNPs                        | 6,583                 | 12,909                |
| % polymorphic sites         | 0.7                   | 1.74                  |
| Average read depth per SNPs | 465                   | 1,124                 |
| % missing data              | 13.7                  | 7.9                   |

|            | <i>A. cebennensis</i> |                  |                  |                  | <i>A. pedemontana</i> |
|------------|-----------------------|------------------|------------------|------------------|-----------------------|
|            | All                   | Ardèche          | Cévennes         | Cantal           | All                   |
| $\pi$      | 0.0026 ± 7.00E-5      | 0.0018 ± 6.00E-5 | 0.0014 ± 6.00E-5 | 0.0020 ± 6.00E-5 | 0.0040 ± 8.00E-5      |
| $\theta_w$ | 0.0021                | 0.0018           | 0.0016           | 0.0018           | 0.0039                |
| $H_{exp}$  | 0.0025 ± 6.00E-5      | 0.0016 ± 6.00E-5 | 0.0013 ± 5.00E-5 | 0.0019 ± 6.00E-5 | 0.0039 ± 8.00E-5      |
| $H_{obs}$  | 0.0022 ± 7.00E-5      | 0.0022 ± 8.00E-5 | 0.0017 ± 8.00E-5 | 0.0024 ± 8.00E-5 | 0.0037 ± 9.00E-5      |



857 **Figures**

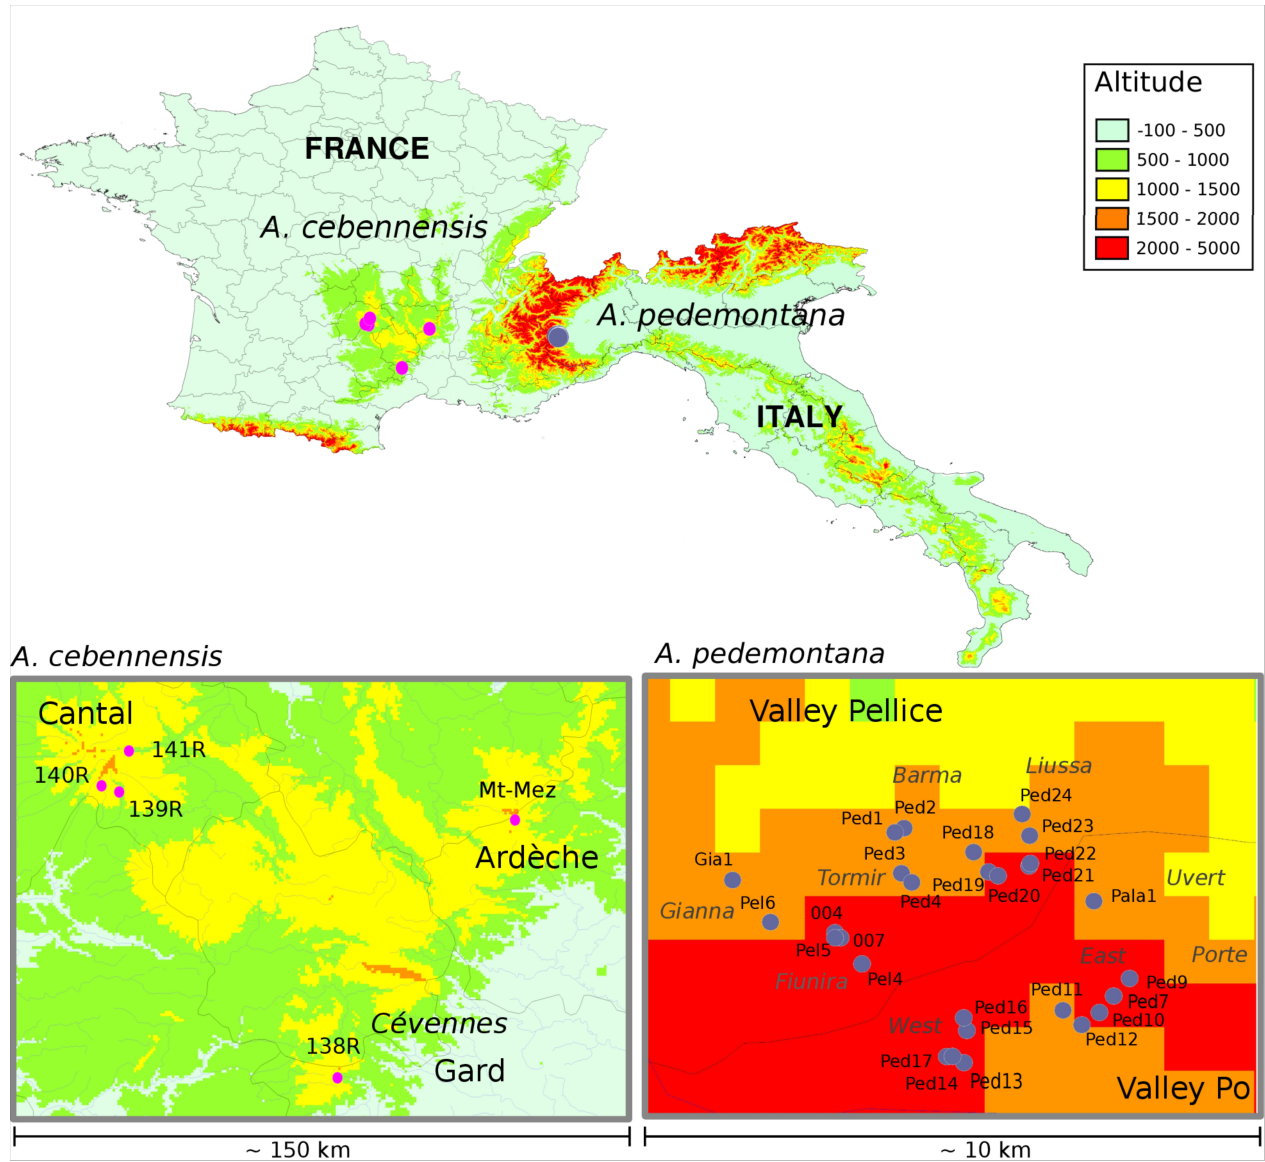

859 Figure 1. Distribution range and altitude of the populations and individuals sampled for *A.*  
860 *cebennensis* and *A. pedemontana*.



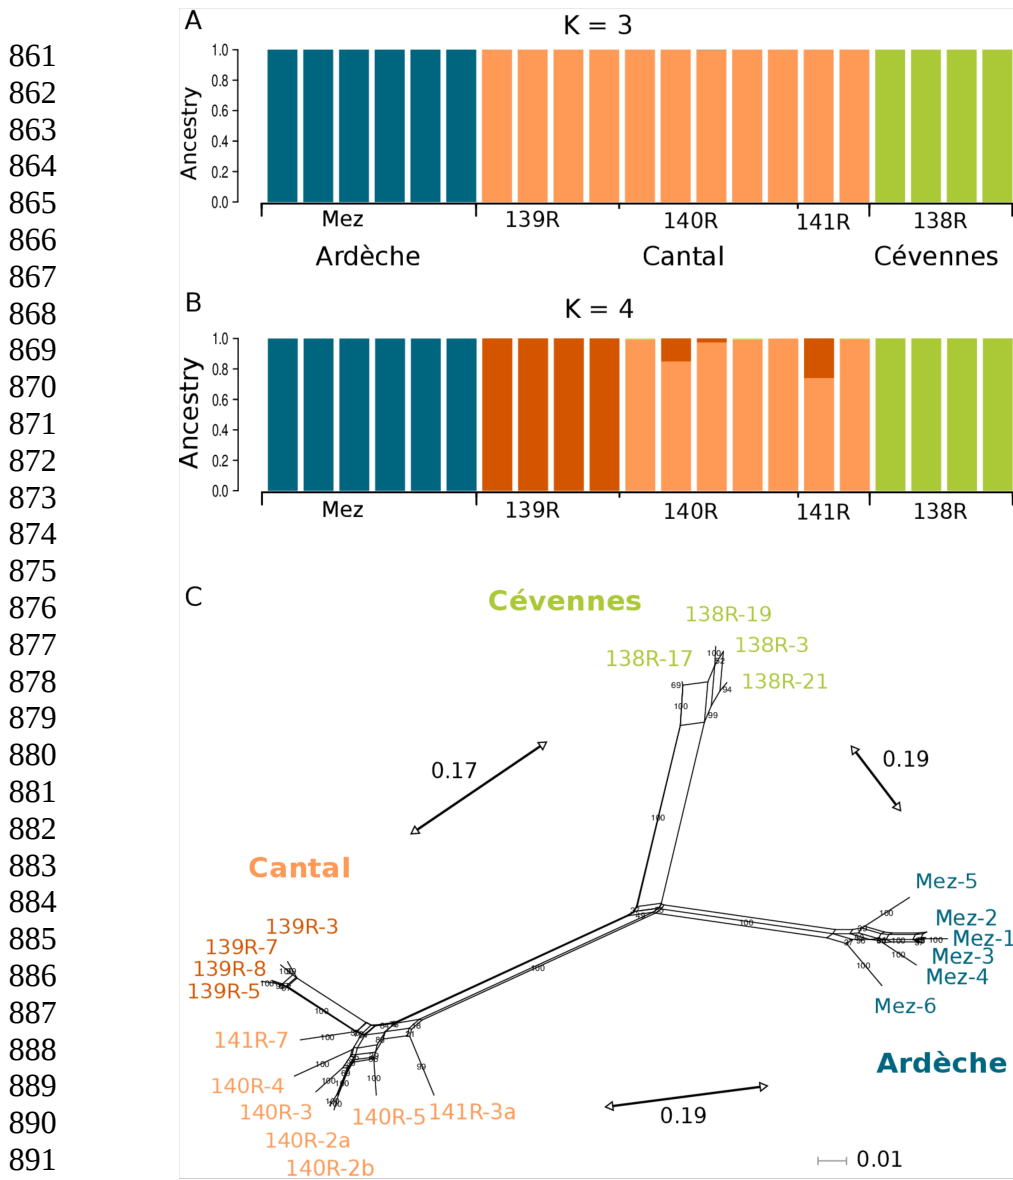

894 Figure 2. Population structure analysis of *A. cebennensis*: A) ADMIXTURE plots for number of  
895 clusters  $K=3$  and  $K=4$ , B) Neighbor-net phylogenetic network. Bootstrap values are indicated on  
896 the network branches.  $F_{st}$  values between the three large populations are indicated along the  
897 arrows.

898  
899  
900  
901  
902  
903  
904  
905  
906  
907  
908  
909  
910  
911  
912  
913  
914  
915  
916  
917  
918  
919  
920  
921  
922  
923  
924  
925  
926  
927  
928  
929  
930

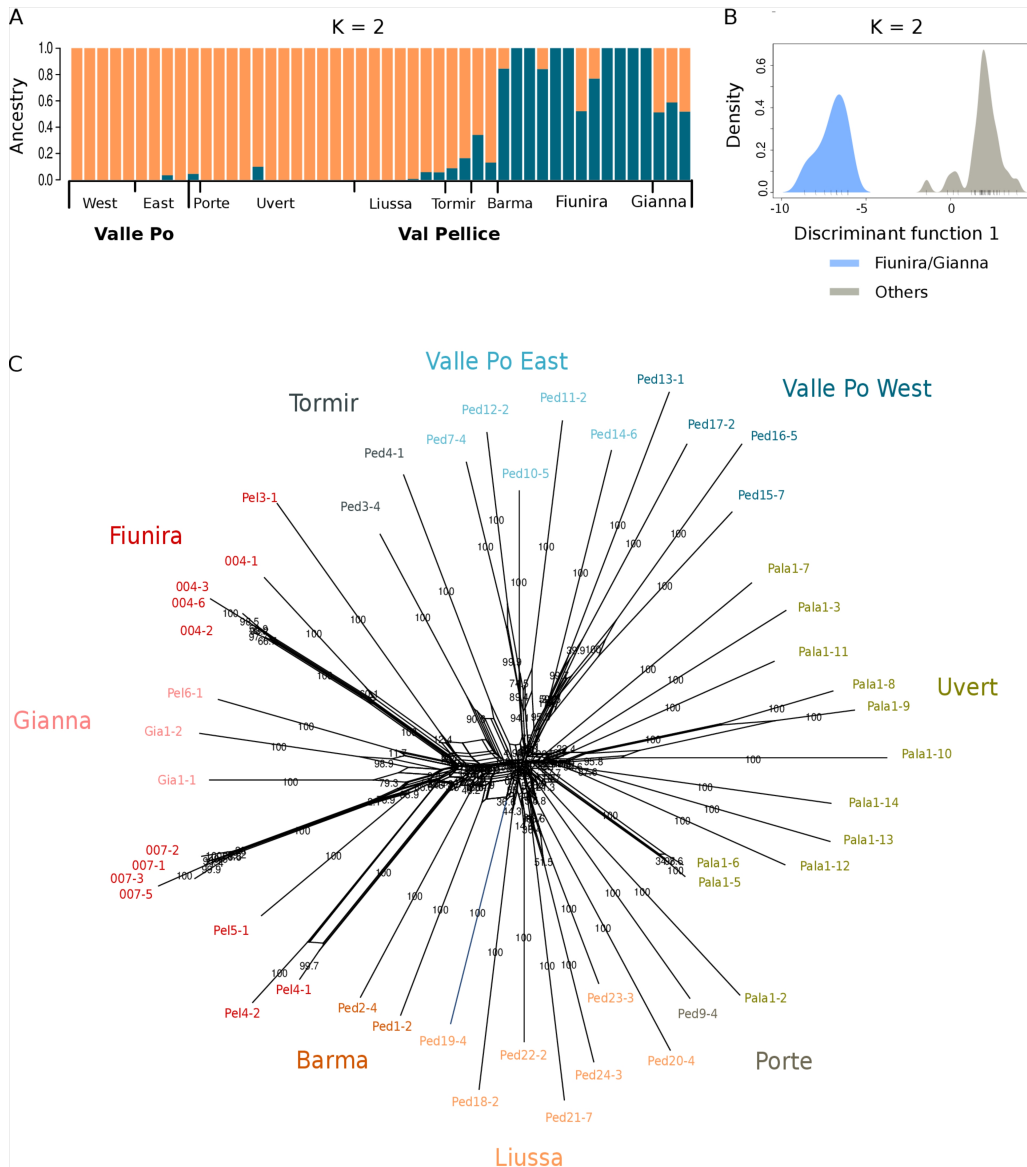

931 Figure 3. Population structure analysis of *A. pedemontana*: A) ADMIXTURE plots for number of  
932 clusters  $K=2$ , B) Plot of DAPC showing the first principal component of the analysis with  $K=2$ ,  
933 with individuals (vertical bars) and groups (colored courbs) plotted on the plane, C) Neighbor-net  
934 phylogenetic network. Bootstrap values are indicated on the network branches.

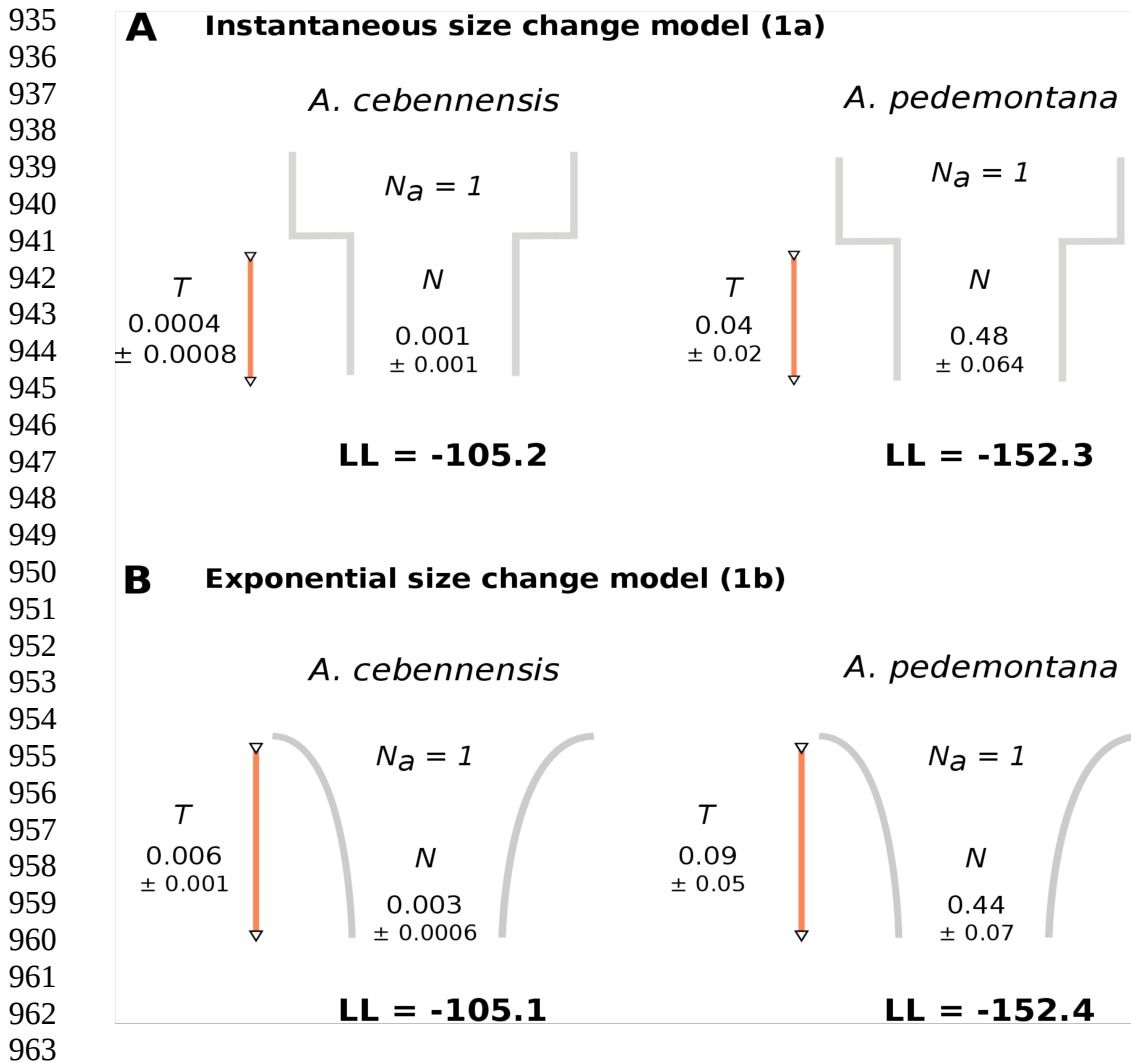

964 Figure 4. Representation of demographic models 1a and 1b and their optimized parameters fitted  
965 to observed data in *A. cebennensis* and *A. pedemontana*. The log likelihood values (LL) are  
966 indicated for each model.

## 967 **Appendices**

968

969 Figure S1. Barcode sequences and design of double-digest GBS libraries

970

971 Figure S2. Comparison of the fitted demographic models. The optimized parameters and log  
972 likelihood values (LL) are indicated for each model. The site frequency spectrum is plotted for  
973 each model in red and compared to the observed data SFS plotted in blue. *Ac* = *Arabidopsis*  
974 *cebennensis*; *Ap* = *A. pedemontana*.

975

976 Figure S3. Genetic assignments of *A. cebennensis* and *A. pedemontana* populations from  
977 population structure analysis with microsatellite and plastid DNA sequences: A) Summary of  
978 microsatellite analysis; B) Distribution of *A. cebennensis* populations analyzed for microsatellite  
979 variation. The color-code refers to STRUCTURE results shown with C; C) STRUCTURE plot of  
980 the microsatellite data with  $K=3$  (highest probability) for 144 *A. cebennensis* individuals from 10  
981 populations. The chloroplast genome type are indicated for each population below the graph (T,  
982 BG, A, BH); D) Spatial distribution of *A. pedemontana* populations analyzed for microsatellite  
983 variation. The color-code refers to STRUCTURE results shown with E; E) STRUCTURE plot of  
984 the microsatellite data with  $K=2$  (highest probability) for 40 *A. pedemontana* individuals from 9  
985 different localities. All individuals carried the same single chloroplast genome type (A).

986

987 Figure S4. Neighbor Net network constructed for *A. cebennensis*, *A. pedemontana* and outgroup  
988 *A. lyrata*. Bootstrap supports are indicated on the branches.

989

990 Figure S5. Cross validation values for each iteration and number of clusters in ADMIXTURE  
991 analyses: A) *A. cebennensis*; B) *A. pedemontana*.

992

993 Figure S6. TreeMix Maximum likelihood tree of *A. cebennensis* three large populations with *A.*  
994 *pedemontana* as outgroup.

995

996 Figure S7. Manhattan plots of  $F_{st}$  values between: A) *A. cebennensis* and *A. pedemontana*  
997 individuals; B) the three large populations of *A. cebennensis*; along *A. lyrata* scaffolds used as  
998 reference sequence.

999

1000 Figure S8. Manhattan plots of nucleotide diversity values ( $\pi$ ) within: A) all *A. cebennensis*  
1001 individuals; B) all *A. pedemontana* individuals; along *A. lyrata* scaffolds used as reference  
1002 sequences.

1003

1004 Table S1. Q-estimates (admixture proportion at the individual level, expressed as the fraction of  
1005 each population that contribute to the individual genome) for *A. pedemontana* individuals, with  
1006 two populations assumed in ADMIXTURE analysis. Individuals for which more than 10% of

1007 each population contribute to the genome are highlighted in grey.

1008

1009 Table S2. SNPs filtering after SNP-calling analysis: 1) Number of total sites, variant sites and  
1010 polymorphic sites at the successive steps of the filtering process, 2) Mean read depth per site, 3)  
1011 Percentage of variant and polymorphic sites on the total number of sites; when calculating the %  
1012 of polymorphic loci, only intraspecific variants and SNPs were taken in account; '>50' = only  
1013 SNPs with data for at least 50% of the sampled individuals; '>70' = only SNPs with data for at  
1014 least 70% of the sampled individuals.

1015

1016 Table S3. SNP-calling results for subsets of 21 randomly chosen *A. pedemontana* samples:  
1017 numbers of intraspecific biallelic SNPs with data for at least 70% (>70) of the sampled  
1018 individuals are indicated.

1019

1020 Text S1. Detailed Materials and Methods

1021

1022

## 1023 **Supporting information**

1024

1025 Supporting information 1. Identification, location and collection informations for samples of *A.*  
1026 *cebennensis* and *A. pedemontana* used in the GBS, microsatellite and plastid DNA analysis.

1027

1028 Supporting information 2. Summary of GBS results in number of raw and processed reads overall  
1029 and per individual. The shaded rows in the second table point out the individuals with less than  
1030 5,000 SNPs in the final calling, which were removed from subsequent analysis.

1031

1032 Supporting information 3. Python script implementing all models used in the demographic  
1033 analyses.
